# Supplementary material for: Tailored Web-Based Interventions for Pain: Systematic Review and Meta-Analysis
Source: PubMed Central journal article supplement (PMC5701966; doi:10.2196/jmir.8826), 2017-11-10

## Forest plots and standardized mean differences

### Tailored Web-based interventions vs. ACTIVE CONTROL

#### 1.1. Pain intensity after completion of intervention: short term

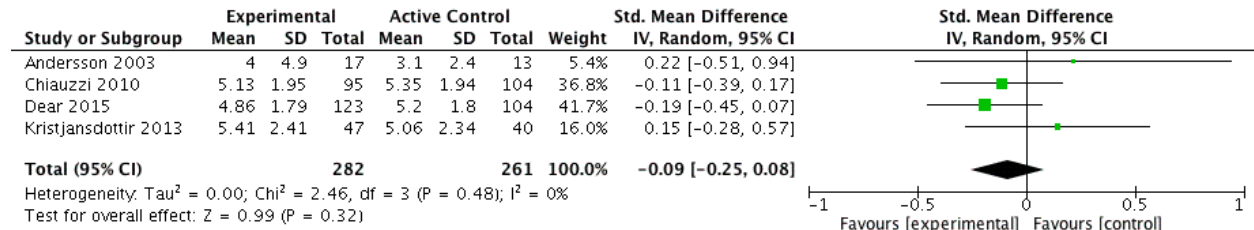

#### 1.2. Pain intensity follow-up (<6 months after completion of intervention): medium term

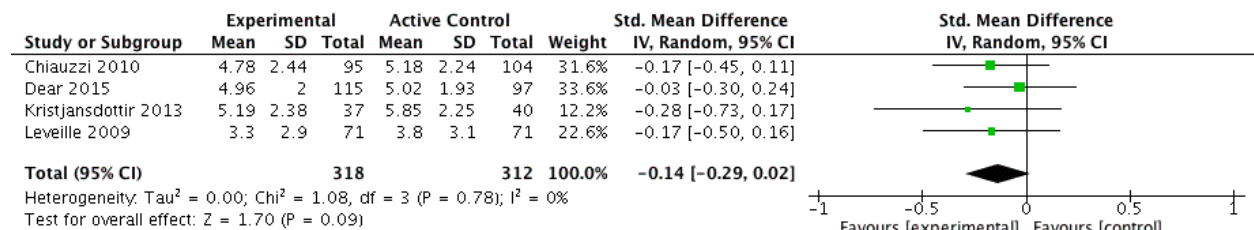

#### 2.1. Pain related disability after completion of intervention: short term

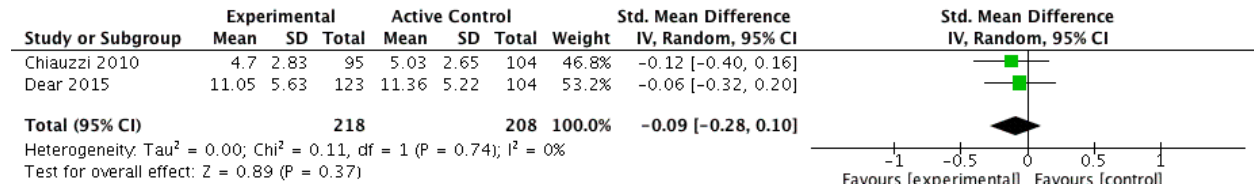

#### 2.2. Pain related disability follow-up (<6 months after completion of intervention): medium term

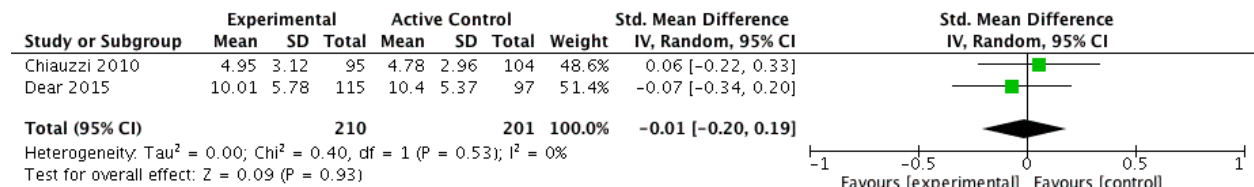

### 3.1. Anxiety after completion of intervention: short term

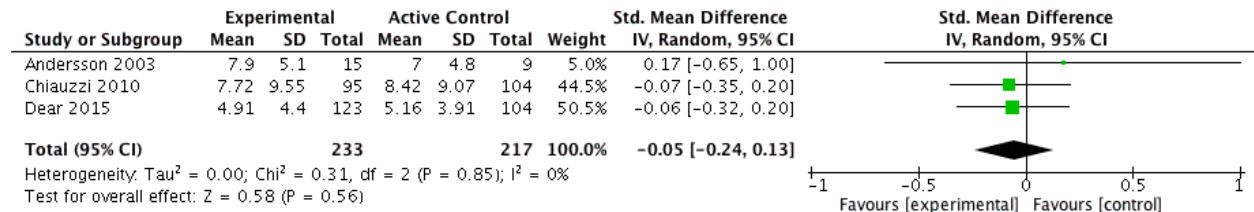

### 3.2. Anxiety follow-up (<6 months after completion of intervention): medium term

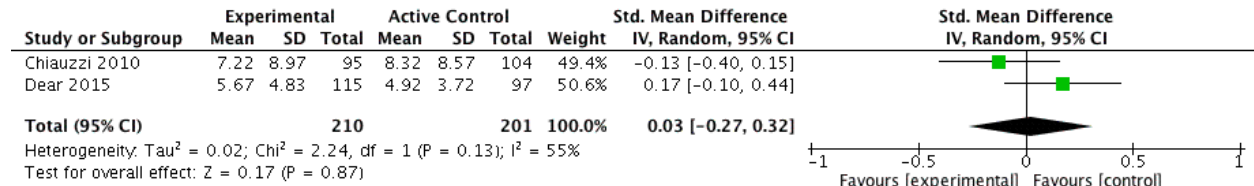

### 4.1. Depression after completion of intervention: short term

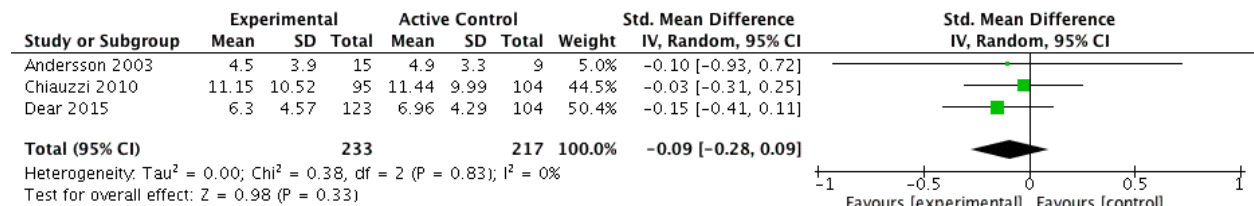

### 4.2. Depression follow-up (<6 months after completion of intervention): medium term

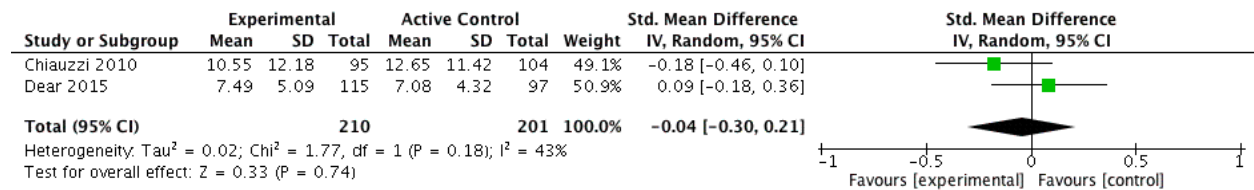

### 5. Pain catastrophizing after completion of intervention: short term

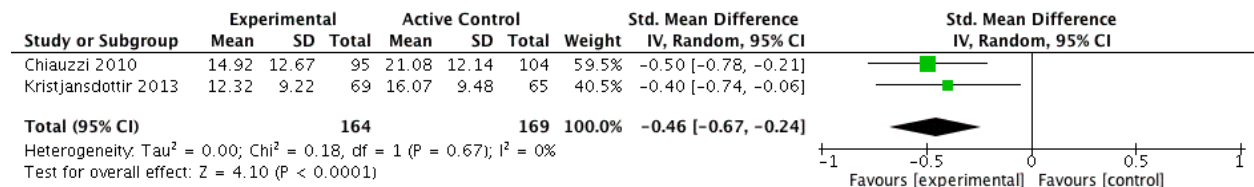

Supplement: jmir_v19i11e385_app2.pdf [file jmir_v19i11e385_app2.pdf]
