# Supplementary material for: Tailored Web-Based Interventions for Pain: Systematic Review and Meta-Analysis
Source: PubMed Central journal article supplement (PMC5701966; doi:10.2196/jmir.8826), 2017-11-10

Funnel plot: Tailored Web-based interventions vs Standard care (n=10)

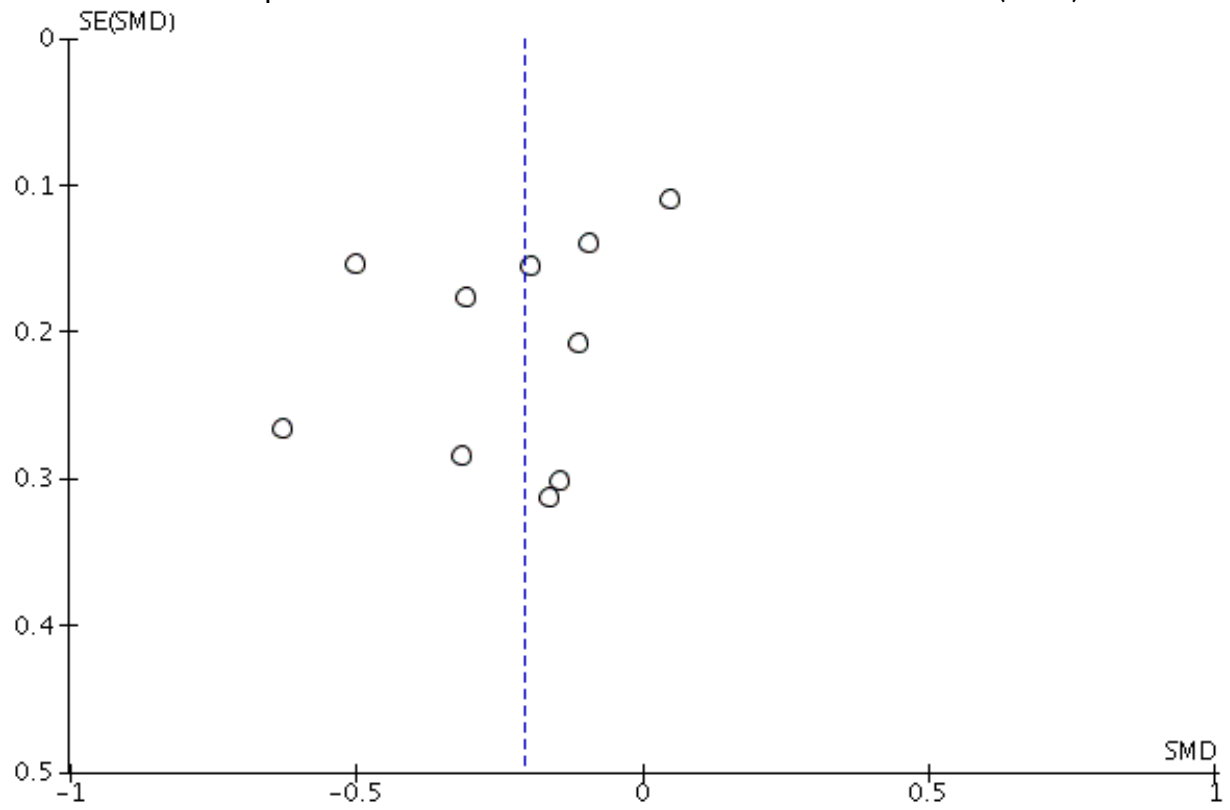

Supplement: jmir_v19i11e385_app3.pdf [file jmir_v19i11e385_app3.pdf]
